# Supplementary material for: Regulating polystyrene glass transition temperature by varying the hydration levels of aromatic ring/Li+ interaction
Source: Royal Society of Chemistry journal article supplement (doi:10.1039/d3cp02995f), 2023-01-01
Supplement: d3cp02995f2.pdf [file d3cp02995f2.pdf]

**Supporting Information for regulating polystyrene glass transition temperature by  
varying hydration level of aromatic ring/Li<sup>+</sup> interaction**

Sze Yuet Chin,<sup>a</sup> Yunpeng Lu,<sup>c</sup> Weishuai Di,<sup>d</sup> Kai Ye,<sup>e</sup> Zihan Li,<sup>g</sup> Chenlu He,<sup>h</sup> Yi Cao,<sup>df</sup> Chun  
Tang<sup>g</sup>, Kai Xue,<sup>ab\*</sup>

27 August 2023

<sup>a</sup> Center of High Field NMR Spectroscopy and Imaging, Science Nanyang Technological  
University, 21 Nanyang Link, Singapore 637371

<sup>b</sup> School of Physical and Mathematical Science, Nanyang Technological University, 21  
Nanyang Link, Singapore 637371

<sup>c</sup> School of Chemistry, Chemical Engineering and Biotechnology, Technological University,  
21 Nanyang Link, Singapore 637371

<sup>d</sup> Collaborative Innovation Center for Advanced Microstructures, National Laboratory of  
Solid state microstructure, Department of Physics, Nanjing University, Nanjing 210093,  
People's Republic of China

<sup>e</sup> School of Materials Science and Engineering, Nanyang Technological University, 50  
Nanyang Avenue, Singapore, 639789, Singapore

<sup>f</sup> Institute for Brain Sciences, Nanjing University, Nanjing 210023, People's Republic of  
China

<sup>g</sup> Beijing National Laboratory for Molecular Sciences, College of Chemistry and Molecular  
Engineering, Peking-Tsinghua Center for life Sciences, Center for Quantitative Biology,  
Academy for Advanced Interdisciplinary Studies, Peking University, Beijing 100871, China

<sup>h</sup> Department of Chemistry, National University of Singapore, Singapore, 117549, Singapore

To whom correspondence should be addressed:

kai.xue@ntu.edu.sg

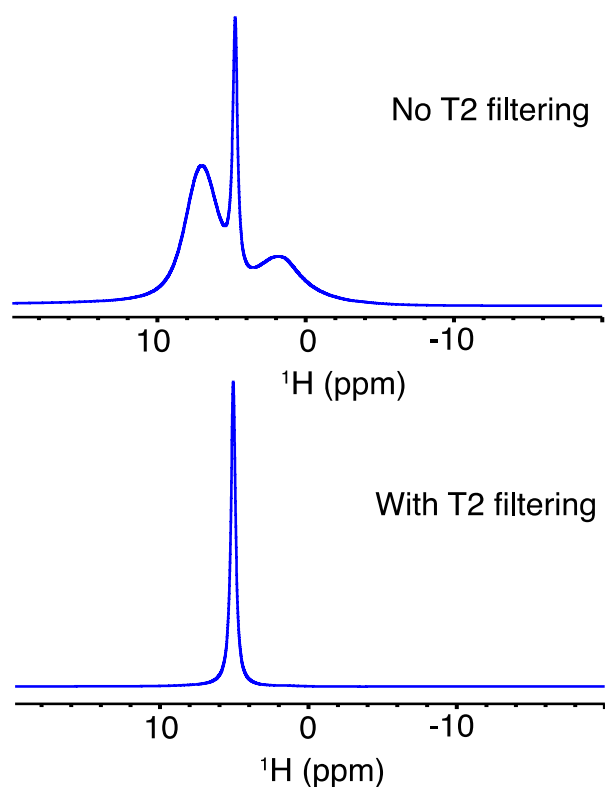

**Figure S1.** Spectra of proton excited experiments with and without T2 filtering. A 200  $\mu$ s T2 filtering is used in this work.

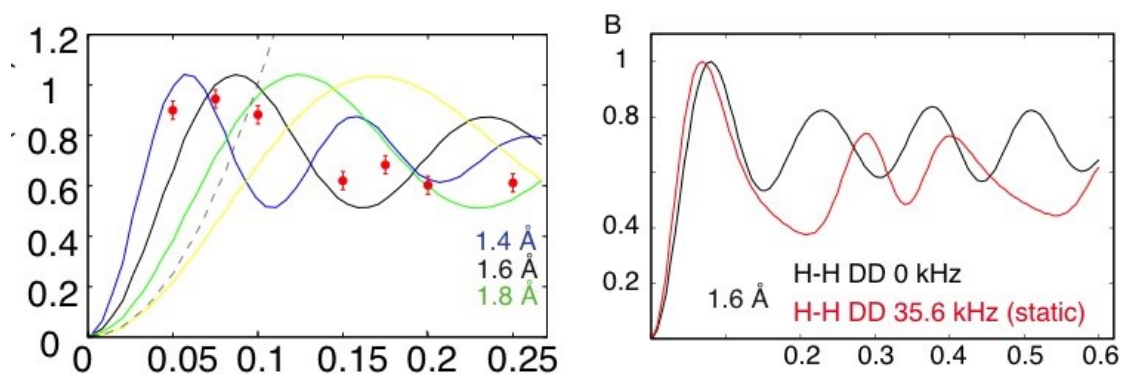

**Figure S2.** Fitting of Li to water distances. A) dipolar couplings are varied for 1.4-2.0 angstrom. B) Two protons are considered in a symmetric geometry, in black we assumed H-H dipolar couplings are completely averaged out by motion while in red is the case of complete static and no average of H-H dipolar couplings.

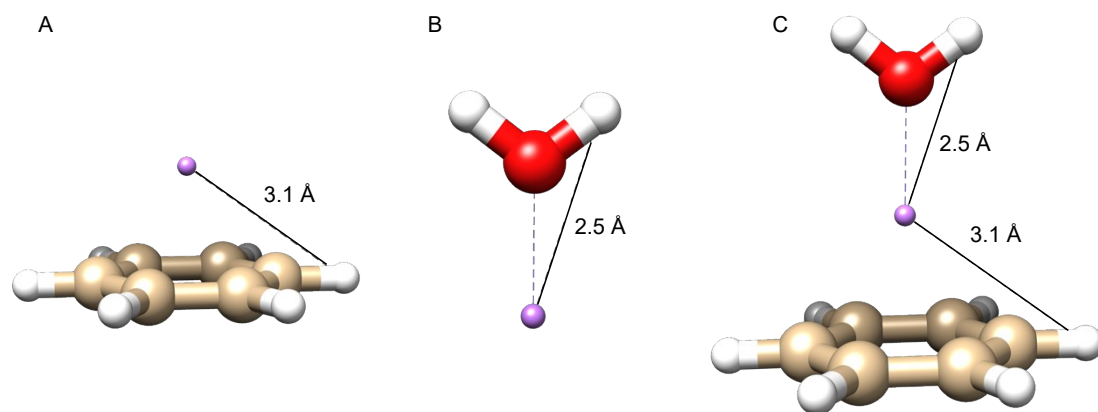

**Figure S3.** DFT simulated model considering lithium mediate in between aromatic ring and water molecule. A) only lithium (purple) and benzene are considered, B) lithium and one water molecule are considered, C) three component system consists of a benzene, water and lithium. Since in the sample preparation water was absorbed to LiCl from the humidity in the air not an aqueous solution, we believe the simulation with 1:1 ratio can already be representative enough for the binding scheme. The second and third water molecule form a second hydration shell by interacting with protons from the first water molecule. Details on simulation is in computational method section.

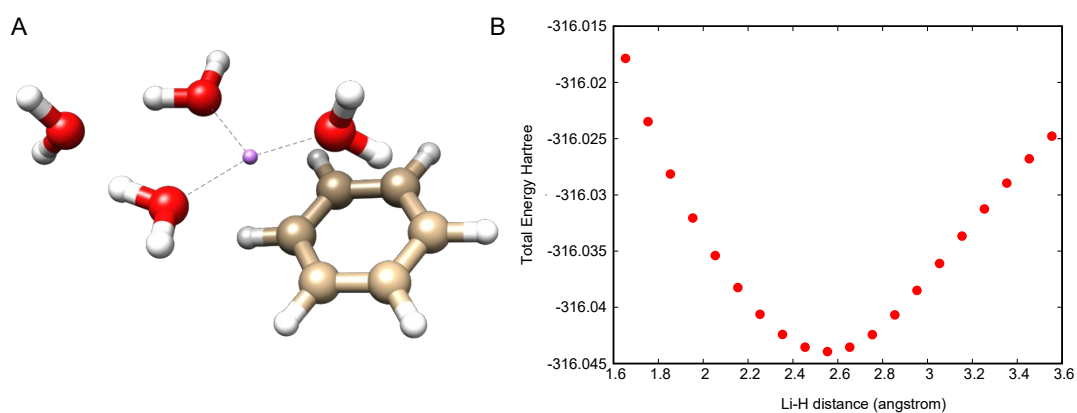

**Figure S4.** A) DFT simulated geometry 4 water hydrated LiCl + aromatic system. Cation- $\pi$  interaction is weakened and lithium is driven away from the centroid position of aromatic ring. B) Surface energy map from simulation. Simulations are performed with a fixed lithium to proton distance and minimize the total energy of the system. Details for simulation please see to computational methods section.

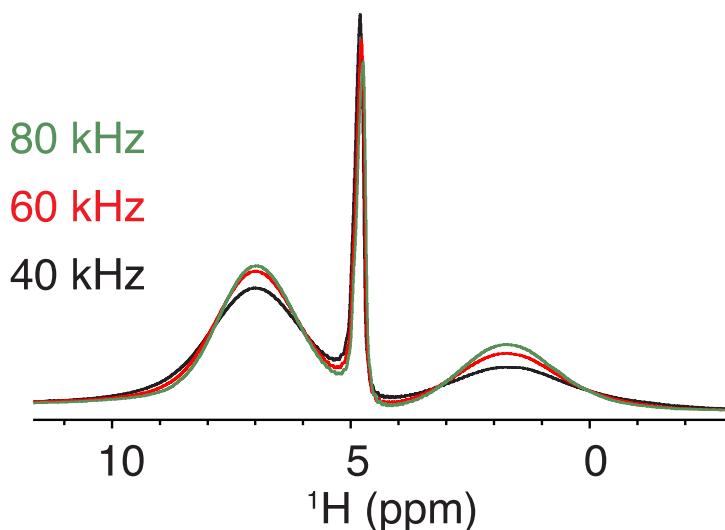

**Figure S5.** MAS dependent proton excitation on PS+LiCL sample after exposing in the air.

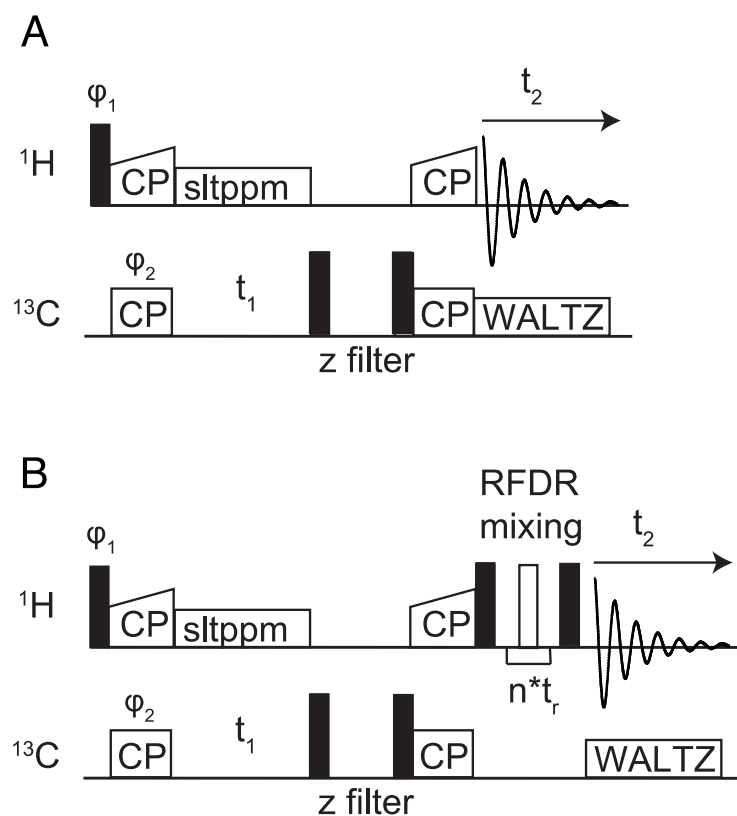

**Figure S6.** HCH and HCHH-RFDR pulse sequences. In CP settings, 700 ms were set in the first H-C cp step and 500 ms were set in the second CP to assure the polarization transfer is limited to one bond. 0-80% ramp were used on  $^1\text{H}$  CP power. 10 kHz waltz were used on  $^{13}\text{C}$  for decoupling on direct dimension and 20 kHz sltppm were used for  $^1\text{H}$  decoupling during  $t_1$ . In RFDR mixing, a gullion phase cycling XY4 were used and hard pulse power of 278 kHz were used during recoupling.

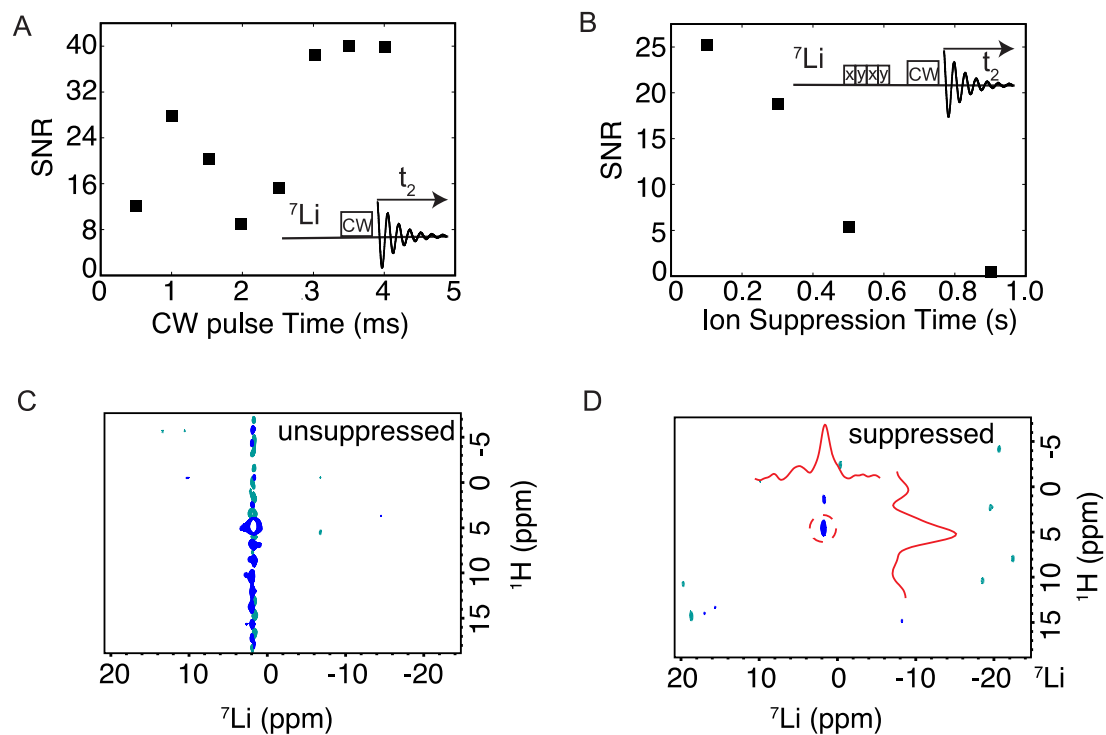

**Figure S7.** A) Excess lithium signals were observed when 60 kHz radio frequencies (rf) was put in the channel. Phase cycling is designed to averaged out this signal with each 4 scans, however the signal was still significant. Signal builds up to a higher intensity with 3-4 ms of pulsing. B) Signal of lithium after different ion suppression times. We saw signal intensities through this pathway drops down. 0.8-0.9 s of presaturation was needed in ion suppression. This is longer than the previously reported 0.1-0.3 s for solvent suppression<sup>1</sup>. C) and D) a comparison of ion suppressed and unsuppressed HETCOR spectrum are shown.

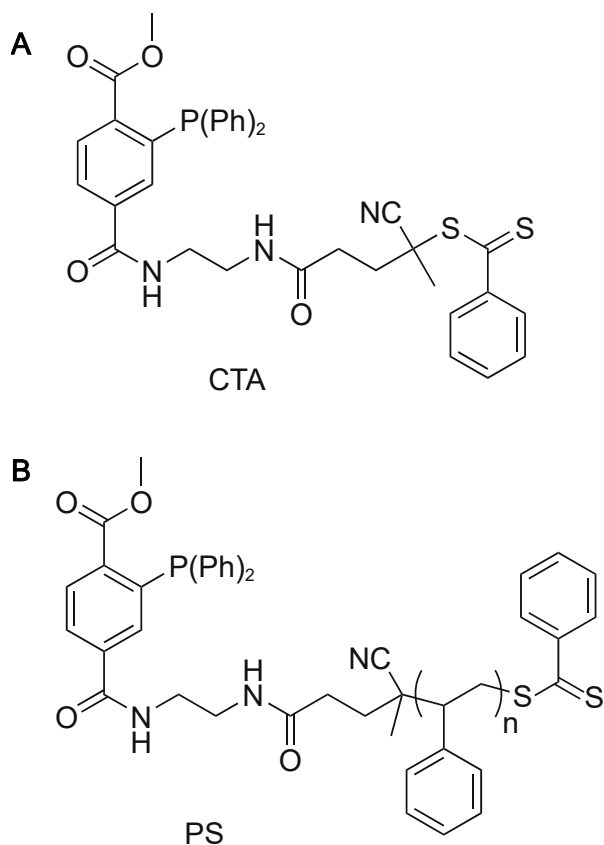

**Figure S8.** Illustrations for molecular structure of A) chain transfer agent (CTA) and B) Polystyrene (PS) with ending groups.

## Materials

The PS was synthesized by the RAFT method<sup>1-2</sup> but adapted from previous literature<sup>3-4</sup>. The RAFT chain transfer agent (CTA) is shown in Figure S3. Specifically, Freshly vacuum distilled styrene (2.86 mL, 2.6g, 25 mmol, 1000 eq.), CTA (16.6 mg, 25  $\mu$ mol, 1 eq.) and AIBN (0.8 mg, 5  $\mu$ mol, 0.2 eq.) were fully mixed in a flame-dried schlenk tube. The freeze-pump-thaw cycles were applied to remove the oxygen and the tube was protected by argon atmosphere. The reaction was in an oil bath of 70 - 75 °C for 72 h -96 h until the liquid became hard solid in the tube. Then the reaction was quenched and the tube was cooled to room temperature. The solid was dissolved by the small amount of THF to prepare highly concentrated PS solution. Such concentrated solution was added into large amount of methanol in the clean beaker, drop by drop and with magneton stirring. Then the methanol was filtered and the precipitated PS polymer was washed by methanol several times. The final polymer was vacuum distilled to remove the residual methanol to obtain the dried the PS polymer.

In order to mix PS and salt, The PS (100 mg) is dissolved in THF (20 mL), then the water is gradually added into solution until the PS begins to separate out. The mixture is vaped under vacuum to remove THF and water is supplemented timely. After that, the aqueous solution containing 0.5 mmol LiCl is added into the abovementioned mixture of PS and water and vaped several times with water.

It's difficult to control the hydration level in our sample. We left PS+LiCl sample unsealed for 20 min and seal again. (Singapore annual average humidity 84%). We observed after 20 min exposure to the air, weight of the sample does not increase any more.

### Thermal test

Differential scanning calorimetry (DSC) (TA, Q10) was conducted in an atmosphere of flowing nitrogen in hermetic aluminium holders over a temperature range from 40°C to 120°C, with a heating rate of 10°C/min.

### Computational Method

All geometries are calculated with Gaussian 09, Revision E.01.<sup>5</sup> The M062X<sup>6</sup> functional and the basis set Def2-TZVP<sup>7-8</sup> are used in the geometry optimization. Vibrational frequency calculations are performed on the optimized geometries to validate these geometries are local minima and also to produce the thermodynamical data in 298.15 K in gas phase.

### Results and Discussion

Table S1. The Formation Gibbs Free Energies for Chemicals from the calculations at 298.15 K in gas phase

| Chemical                                                                  | $\Delta G_f^\ominus(298.15\text{ K})$ (Hartree) |
|---------------------------------------------------------------------------|-------------------------------------------------|
| Li <sup>+</sup>                                                           | -7.2956                                         |
| H <sub>2</sub> O                                                          | -76.4227                                        |
| C <sub>6</sub> H <sub>6</sub>                                             | -232.1509                                       |
| Li <sup>+</sup> - H <sub>2</sub> O Complex                                | -83.7649                                        |
| Li <sup>+</sup> - C <sub>6</sub> H <sub>6</sub> Complex                   | -239.4968                                       |
| C <sub>6</sub> H <sub>6</sub> -Li <sup>+</sup> - H <sub>2</sub> O Complex | -315.9507                                       |

|                                                                             |           |
|-----------------------------------------------------------------------------|-----------|
| C <sub>6</sub> H <sub>6</sub> -Li <sup>+</sup> -4H <sub>2</sub> O Complex   | -545.2544 |
| C <sub>6</sub> H <sub>6</sub> -Li <sup>+</sup> -4H <sub>2</sub> O Complex 2 | -545.2552 |

Table S2 The Gibbs Free Energy changes of the several complexation processes at 298.15 K in gas phase

| Complexation Process                                                                                                                                | $\Delta G_r^\ominus(298.15\text{ K})$ (kJ/mol) |
|-----------------------------------------------------------------------------------------------------------------------------------------------------|------------------------------------------------|
| Li <sup>+</sup> + H <sub>2</sub> O → Li <sup>+</sup> - H <sub>2</sub> O Complex                                                                     | -122.3                                         |
| Li <sup>+</sup> + C <sub>6</sub> H <sub>6</sub> → Li <sup>+</sup> - C <sub>6</sub> H <sub>6</sub> Complex                                           | -132.1                                         |
| Li <sup>+</sup> + C <sub>6</sub> H <sub>6</sub> + H <sub>2</sub> O → C <sub>6</sub> H <sub>6</sub> -Li <sup>+</sup> - H <sub>2</sub> O Complex      | -214.0                                         |
| Li <sup>+</sup> + C <sub>6</sub> H <sub>6</sub> + 4 H <sub>2</sub> O → C <sub>6</sub> H <sub>6</sub> -Li <sup>+</sup> - 4H <sub>2</sub> O Complex   | -307.4                                         |
| Li <sup>+</sup> + C <sub>6</sub> H <sub>6</sub> + 4 H <sub>2</sub> O → C <sub>6</sub> H <sub>6</sub> -Li <sup>+</sup> - 4H <sub>2</sub> O Complex 2 | -309.5                                         |

The free energy calculations show that all the Li<sup>+</sup> cation complexation with either water or benzene are spontaneous, which is well expected as the positive charge ion can be stabilized by the electron lone pair in water or pi-electron clouds in benzene ring through electrostatic interaction. Geometry optimization results show that with the increase of the water molecule's number, Li<sup>+</sup> cation moves away from the benzene ring and is solvated in the water cage.

Li<sup>+</sup>

Sum of electronic and zero-point Energies= -7.282882 Hartree  
Sum of electronic and thermal Energies= -7.281466 Hartree  
Sum of electronic and thermal Enthalpies= -7.280522 Hartree  
Sum of electronic and thermal Free Energies= -7.295630 Hartree

H<sub>2</sub>O

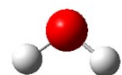

O -0.000000 0.116235 -0.000001  
H 0.764251 -0.464941 0.000003  
H -0.764251 -0.464941 0.000003

Sum of electronic and zero-point Energies= -76.404570 Hartree  
Sum of electronic and thermal Energies= -76.401734 Hartree  
Sum of electronic and thermal Enthalpies= -76.400790 Hartree  
Sum of electronic and thermal Free Energies= -76.422860 Hartree

C<sub>6</sub>H<sub>6</sub>



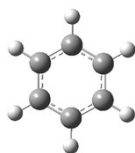

|   |           |           |           |
|---|-----------|-----------|-----------|
| C | -1.051409 | -0.906841 | 0.000017  |
| C | -1.311064 | 0.457082  | 0.000042  |
| C | -0.259661 | 1.363928  | 0.000057  |
| C | 1.051409  | 0.906841  | 0.000044  |
| C | 1.311063  | -0.457082 | 0.000019  |
| C | 0.259661  | -1.363929 | 0.000007  |
| H | -1.871000 | -1.613905 | -0.000206 |
| H | -2.333149 | 0.813481  | -0.000173 |
| H | -0.462202 | 2.427243  | -0.000146 |
| H | 1.870999  | 1.613906  | -0.000168 |
| H | 2.333150  | -0.813479 | -0.000203 |
| H | 0.462202  | -2.427243 | -0.000215 |

Sum of electronic and zero-point Energies= -232.123443 Hartree  
 Sum of electronic and thermal Energies= -232.119071 Hartree  
 Sum of electronic and thermal Enthalpies= -232.118127 Hartree  
 Sum of electronic and thermal Free Energies= -232.150887 Hartree

#### Li<sup>+</sup>- H<sub>2</sub>O Complex

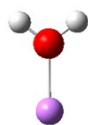

|    |           |           |           |
|----|-----------|-----------|-----------|
| Li | 1.490959  | -0.000115 | 0.000001  |
| O  | -0.331030 | -0.000088 | -0.000001 |
| H  | -0.913120 | -0.771190 | 0.000003  |
| H  | -0.911518 | 0.772237  | 0.000003  |

Sum of electronic and zero-point Energies= -83.743109 Hartree  
 Sum of electronic and thermal Energies= -83.739637 Hartree  
 Sum of electronic and thermal Enthalpies= -83.738693 Hartree  
 Sum of electronic and thermal Free Energies= -83.764878 Hartree

#### Li<sup>+</sup>- C<sub>6</sub>H<sub>6</sub> Complex

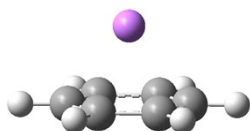

|   |           |           |           |
|---|-----------|-----------|-----------|
| C | 1.240792  | 0.641142  | -0.119474 |
| C | 0.065160  | 1.395143  | -0.119448 |
| C | -1.175690 | 0.753999  | -0.119414 |
| C | -1.240824 | -0.641142 | -0.119422 |
| C | -0.065169 | -1.395115 | -0.119503 |
| C | 1.175681  | -0.753990 | -0.119530 |
| H | 2.202162  | 1.137846  | -0.124960 |
| H | 0.115706  | 2.476056  | -0.125068 |
| H | -2.086532 | 1.338192  | -0.125321 |

|    |           |           |           |
|----|-----------|-----------|-----------|
| H  | -2.202195 | -1.137831 | -0.125009 |
| H  | -0.115730 | -2.476036 | -0.125027 |
| H  | 2.086522  | -1.338181 | -0.125126 |
| Li | 0.000124  | -0.000087 | 1.683753  |

Sum of electronic and zero-point Energies= -239.468403 Hartree  
Sum of electronic and thermal Energies= -239.462951 Hartree  
Sum of electronic and thermal Enthalpies= -239.462007 Hartree  
Sum of electronic and thermal Free Energies= -239.496805 Hartree

#### C<sub>6</sub>H<sub>6</sub>-Li<sup>+</sup>- H<sub>2</sub>O Complex

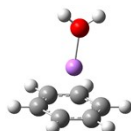

|    |          |          |          |
|----|----------|----------|----------|
| C  | 0.77995  | 0.70835  | -1.20839 |
| C  | 0.82044  | -0.68619 | -1.20824 |
| C  | 0.83935  | -1.38327 | 0.00042  |
| C  | 0.81857  | -0.68603 | 1.20894  |
| C  | 0.77808  | 0.70852  | 1.20885  |
| C  | 0.75819  | 1.40549  | 0.00017  |
| H  | 0.77123  | 1.24907  | -2.14543 |
| H  | 0.84263  | -1.22673 | -2.14518 |
| H  | 0.87746  | -2.46460 | 0.00052  |
| H  | 0.83910  | -1.22644 | 2.14600  |
| H  | 0.76771  | 1.24935  | 2.14581  |
| H  | 0.73417  | 2.48723  | 0.00007  |
| Li | -1.06656 | -0.04328 | -0.00090 |
| O  | -2.92439 | -0.03469 | -0.00097 |
| H  | -3.50763 | -0.80221 | -0.00138 |
| H  | -3.49732 | 0.74053  | -0.00051 |

Sum of electronic and zero-point Energies= -315.915489 Hartree  
Sum of electronic and thermal Energies= -315.906366 Hartree  
Sum of electronic and thermal Enthalpies= -315.905422 Hartree  
Sum of electronic and thermal Free Energies= -315.950737 Hartree

#### C<sub>6</sub>H<sub>6</sub>-Li<sup>+</sup>-4H<sub>2</sub>O Complex

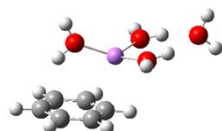

|   |          |          |          |
|---|----------|----------|----------|
| C | -1.37711 | -1.20306 | -0.92047 |
| C | -0.79779 | 0.00455  | -1.29938 |
| C | -1.37914 | 1.20878  | -0.91311 |
| C | -2.54892 | 1.20547  | -0.16265 |
| C | -3.13518 | -0.00209 | 0.20409  |
| C | -2.54684 | -1.20636 | -0.17003 |
| H | -0.93138 | -2.13843 | -1.23367 |
| H | 0.09340  | 0.00720  | -1.91656 |
| H | -0.93510 | 2.14685  | -1.22061 |
| H | -3.01379 | 2.14073  | 0.12041  |
| H | -4.05990 | -0.00461 | 0.76716  |

|    |          |          |          |
|----|----------|----------|----------|
| H  | -3.01011 | -2.14414 | 0.10725  |
| Li | 0.77926  | -0.00049 | 0.62347  |
| O  | 1.96664  | 1.41709  | 0.23031  |
| H  | 2.88118  | 1.20636  | -0.01610 |
| H  | 1.90509  | 2.36329  | 0.38425  |
| O  | 1.96656  | -1.41749 | 0.22736  |
| H  | 2.88097  | -1.20787 | -0.02036 |
| O  | -0.43058 | -0.00519 | 2.05594  |
| H  | -0.35071 | -0.00524 | 3.01342  |
| H  | 1.90371  | -2.36378 | 0.38023  |
| H  | -1.37287 | -0.00343 | 1.83641  |
| O  | 4.32449  | 0.00046  | -0.42942 |
| H  | 5.09325  | -0.00075 | 0.15271  |
| H  | 4.67148  | 0.00253  | -1.32916 |

Sum of electronic and zero-point Energies= -545.206923 Hartree  
Sum of electronic and thermal Energies= -545.188652 Hartree  
Sum of electronic and thermal Enthalpies= -545.187708 Hartree  
Sum of electronic and thermal Free Energies= -545.254352 Hartree

#### C<sub>6</sub>H<sub>6</sub>-Li<sup>+</sup>-4H<sub>2</sub>O Complex 2

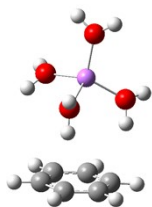

|    |          |          |          |
|----|----------|----------|----------|
| C  | 2.15286  | -1.37622 | 0.18785  |
| C  | 2.47606  | -0.44569 | 1.17241  |
| C  | 2.38220  | 0.91514  | 0.90529  |
| C  | 1.98011  | 1.34582  | -0.35508 |
| C  | 1.65240  | 0.41740  | -1.33723 |
| C  | 1.73205  | -0.94370 | -1.06383 |
| H  | 2.24572  | -2.43472 | 0.39398  |
| H  | 2.82280  | -0.78221 | 2.14140  |
| H  | 2.64658  | 1.63678  | 1.66691  |
| H  | 1.96204  | 2.40661  | -0.57826 |
| H  | 1.36171  | 0.75140  | -2.32549 |
| H  | 1.50153  | -1.66472 | -1.83751 |
| Li | -2.07749 | 0.10538  | -0.00081 |
| O  | -0.81260 | -0.46189 | 1.31035  |
| H  | -1.04727 | -0.48168 | 2.24344  |
| H  | 0.15558  | -0.45711 | 1.26974  |
| O  | -2.14125 | -1.51405 | -1.02910 |
| H  | -2.44483 | -1.74995 | -1.90994 |
| O  | -1.34717 | 1.70536  | -0.70681 |
| H  | -1.64720 | 2.40268  | -1.29631 |
| H  | -1.51078 | -2.18777 | -0.75452 |
| H  | -0.39136 | 1.80120  | -0.60586 |
| O  | -3.81800 | 0.30547  | 0.75989  |
| H  | -4.47675 | -0.39555 | 0.73551  |
| H  | -4.24728 | 1.08329  | 1.12827  |

Sum of electronic and zero-point Energies= -545.208159 Hartree  
Sum of electronic and thermal Energies= -545.190358 Hartree  
Sum of electronic and thermal Enthalpies= -545.189413 Hartree  
Sum of electronic and thermal Free Energies= -545.255154 Hartree

## Reference:

1. De Brouwer, H.; Schellekens, M. A. J.; Klumperman, B.; Monteiro, M. J.; German, A. L. Controlled radical copolymerization of styrene and maleic anhydride and the synthesis of novel polyolefin-based block copolymers by reversible addition-fragmentation chain-transfer (RAFT) polymerization. *Journal of Polymer Science Part A: Polymer Chemistry* **2000**, *38* (19), 3596-3603.
2. Moad, G.; Chong, Y. K.; Postma, A.; Rizzardo, E.; Thang, S. H. Advances in RAFT polymerization: the synthesis of polymers with defined end-groups. *Polymer* **2005**, *46* (19), 8458-8468.
3. Di, W.; Gao, X.; Huang, W.; Sun, Y.; Lei, H.; Liu, Y.; Li, W.; Li, Y.; Wang, X.; Qin, M.; Zhu, Z.; Cao, Y.; Wang, W. Direct Measurement of Length Scale Dependence of the Hydrophobic Free Energy of a Single Collapsed Polymer Nanosphere. *Physical Review Letters* **2019**, *122* (4).
4. Di, W.; Wang, X.; Zhou, Y.; Mei, Y.; Wang, W.; Cao, Y. Fluorination Increases Hydrophobicity at the Macroscopic Level but not at the Microscopic Level. *Chinese Physics Letters* **2022**, *39* (3).
5. Frisch, M. J.; Trucks, G. W.; Schlegel, H. B.; Scuseria, G. E.; Robb, M. A.; Cheeseman, J. R.; Scalmani, G.; Barone, V.; Petersson, G. A.; Nakatsuji, H.; Li, X.; Caricato, M.; Marenich, A. V.; Bloino, J.; Janesko, B. G.; Gomperts, R.; Mennucci, B.; Hratchian, H. P.; Ortiz, J. V.; Izmaylov, A. F.; Sonnenberg, J. L.; Williams; Ding, F.; Lipparini, F.; Egidi, F.; Goings, J.; Peng, B.; Petrone, A.; Henderson, T.; Ranasinghe, D.; Zakrzewski, V. G.; Gao, J.; Rega, N.; Zheng, G.; Liang, W.; Hada, M.; Ehara, M.; Toyota, K.; Fukuda, R.; Hasegawa, J.; Ishida, M.; Nakajima, T.; Honda, Y.; Kitao, O.; Nakai, H.; Vreven, T.; Throssell, K.; Montgomery Jr., J. A.; Peralta, J. E.; Ogliaro, F.; Bearpark, M. J.; Heyd, J. J.; Brothers, E. N.; Kudin, K. N.; Staroverov, V. N.; Keith, T. A.; Kobayashi, R.; Normand, J.; Raghavachari, K.; Rendell, A. P.; Burant, J. C.; Iyengar, S. S.; Tomasi, J.; Cossi, M.; Millam, J. M.; Klene, M.; Adamo, C.; Cammi, R.; Ochterski, J. W.; Martin, R. L.; Morokuma, K.; Farkas, O.; Foresman, J. B.; Fox, D. J. *Gaussian 16 Rev. C.01*, Wallingford, CT, 2016.
6. Zhao, Y.; Truhlar, D. G. The M06 suite of density functionals for main group thermochemistry, thermochemical kinetics, noncovalent interactions, excited states, and transition elements: two new functionals and systematic testing of four M06-class functionals and 12 other functionals. *Theoretical Chemistry Accounts* **2007**, *120* (1-3), 215-241.
7. Weigend, F.; Ahlrichs, R. Balanced basis sets of split valence, triple zeta valence and quadruple zeta valence quality for H to Rn: Design and assessment of accuracy. *Physical Chemistry Chemical Physics* **2005**, *7* (18).
8. Weigend, F. Accurate Coulomb-fitting basis sets for H to Rn. *Physical Chemistry Chemical Physics* **2006**, *8* (9).

## Topspin Code for the ion suppressed HETCORE measurement

```
;cp HETCOR  
;  
;TS3.5pl6, 2018.06.19  
;
```

```

;
;Avance III version
;parameters:
;p3 : proton 90 at power level PLW12
;p15 : contact time at PLW1(f1) and SPW0(f2)
;p11 : X power level during contact
;p12 : 1H 90 power level, used
;p112 : decoupling power level (if not PLW13)
;sp0 : proton power level during contact
;sp1 : X power level during contact
;cnst21 : on resonance, usually = 0
;cpdprg2 : e.g. cw, spinal64 (at PLW12)
;d1 : recycle delay
;pcpd2 : pulse length in decoupling sequence (e.g. 180deg)
;spnam0 : use e.g. ramp.100 or ramp90100.100 for variable amplitude CP
;zgoptns : -Dfslg, -Dlacq, -Dlcp15, or blank
;
;
;$CLASS=Solids
;$DIM=1D
;$TYPE=cross polarisation
;$SUBTYPE=simple 1D
;$COMMENT=basic cp experiment, arbitrary contact and decoupling schemes

#include <Avancesolids.incl>
#include <trigg.incl>
    ; definition of external trigger output

"acqt0=-(p1*2/3.1416)-0.5u"

"in0=inf1"           ;#####
"d0=1u"             ;# t1_init => 0, 0 #
"in30=inf1"         ;#####

define delay ONTIME ;#####

"t0=0"

Prepare, ze

"ONTIME=aq+d0+p15"

#ifdef lcp15
#include <p15_prot.incl>
    ;make sure p15 does not exceed 10 msec
    ;let supervisor change this pulseprogram if
    ;more is needed
#endif
#ifdef lacq
    ;disable protection file for long acquisition change decoupling
power !!! or you risk probe damage
    ;if you set the label lacq (ZGOPTNS -Dlacq), the protection is disabled

#include <ONTIME_prot.incl>
    ;total RF deposition restriction

#include <aq_prot.incl>
    ;allows max. 50 msec acquisition time, supervisor
    ;may change to max. 1s at less than 5 % duty cycle

```

```

;and reduced decoupling field
#endif

#include <t1_prot.incl>
;check d0 and d30

;#####
;#      Start of Active Pulse Program      #
;#####

Start, 30m do:f2
d1

trigg
1u fq=0.0:f2      ;set 1H on resonance

if "l0>0"
{
"d51=d0-2u"
}

(p3 pl2 ph1):f2
;#####a t2 filter#####
d3
(p3*2 pl2 ph0):f2
d3
;#####

;#####
;#      t1 evolution      #
;#####

if "l0>0"
{
0.5u
d51
0.5u
}
;#####suppression#####

(p3 pl2 ph3):f2      ; brings magn. to z

0.5u cpds4:f1 pl13:f1
d19*0.25
0.5u do:f1

0.5u cpds5:f1
d19*0.25
0.5u do:f1

0.5u cpds4:f1
d19*0.25
0.5u do:f1

0.5u cpds5:f1
d19*0.25
0.5u do:f1

```

```

(p3 p2 ph4):f2      ; brings magn. to y
;#####

(p15:sp1 ph2):f1 (p15:sp0 ph10):f2
; (p15:sp1 ph5):f1 (p15:sp0 ph11):f2
;d3
;(p1*2 p11 ph6):f1
;d3
(0.5u p112):f2
0.5u cpds2:f2      ;p112 is used here with tppm, spinal, p113 with cwlg, cwlg
gosc ph31
1m do:f2
lo to Start times ns

30m mc #0 to Start
F1PH(caliph(ph1, +90), caldel(d0, +in0) & caldel(d30, -in30) & calcl(10, 1))

HaltAcqu, 1m
exit

ph0= 0
ph1= 1 3 1 3 3 1 3 1
    3 1 3 1 1 3 1 3
;ph1= 1 3
ph2= 0 0 2 2 1 1 3 3
;ph2 = 0 0 2 2 1 1 3 3
ph3= 1
ph4= 3
ph5=2 2 0 0 3 3 1 1
ph6=1 1 1 1 2 2 2 2
ph10= 0
ph11= 2
ph31= 0 2 2 0 3 1 1 3
    2 0 0 2 1 3 3 1
;ph31 = 0 2 2 0 1 3 3 1

;Sid: $

```

### Solid state NMR simulation, SIMPSON Code:

```

spinsys {
  channels 7Li 1H
  nuclei 7Li 1H
  dipole 1 2 -17014.1 0 0 0
}

par {
  spin_rate      20000
  proton_frequency 600e6
  crystal_file   zcw986
  gamma_angles   8
  sw             spin_rate/gamma_angles
  np             16
  start_operator I2x
  detect_operator I1p
}

```

```

method      direct
# verbose   1101
variable nmr 50
variable tsw 50
}

proc pulseq {} {
  global par
  # reset
  # acq_block {pulse $par(tsw) 60000 x 40000 x}
  reset
  pulse $par(tsw) 65000 x 45000 x
  acq
}

proc main {} {
  global par

  set fp [ open "1.4A.dat" "w" ]
  set NN 300
  for {set nmr1 1} {$nmr1 <= $NN} {incr nmr1} {
    set par(nmr) [expr $nmr1]
    set par(tsw) [expr $par(nmr)*2]
    set f [fsimpson]
    #fsave $f $par(name).fid
    set val [fmaxheight $f -abs]
    #set val [findex $f 1 -re]
    #puts "[expr $par(tsw)] [lindex $val 0]"
    puts $fp "[expr $par(tsw)] [lindex $val 0]"

    funload $f
  }
  close $fp
}

```

---



---

## RFDR simulation

```

spinsys {
  channels 1H
  nuclei 1H 1H
  shift 1 7p 0 0 0 0
  shift 2 0p 0 0 0 0
  dipole 1 2 -3056.2 0 0 0
}

par {
  spin_rate      80000
  proton_frequency 800e6
  crystal_file   rep30
  gamma_angles   1
  sw             spin_rate/8*gamma_angles
  np             100
  start_operator 1lz
}

```



```

detect_operator I2p
method      direct
# verbose   1101
variable nmr 50
}

proc pulseq [5] {
global par

set tr [expr 1.0e6/$par(spin_rate)]
set tr2 [expr $tr/2.0-0.8]
reset
delay $tr2
pulse 1.6 312500 x
delay $tr2
store 1

reset
delay $tr2
pulse 1.6 312500 y
delay $tr2
store 2

reset
foreach i {1 2 1 2 2 1 2 1} {
prop $i
}
store 8

reset
prop 8 $par(nmr)
pulseid 1 250000 y
acq
}

proc main [5] {
global par

set fp [ open "3.4A.dat" "w"]
set NN 30
for {set nmr1 0} {$nmr1 <= $NN} {incr nmr1} {
set par(nmr) [expr $nmr1]
set f [fsimpson]
#fsave $f $par(name).fid
set val [fmaxheight $f -abs]
#set val [findex $f 1 -re]
puts "[expr $nmr1] [lindex $val 0]"
puts $fp "[expr 8.0/$par(spin_rate)*$nmr1] [lindex $val 0]"

funload $f
}
close $fp
}

```
